# Supplementary material for: Phloem-Conducting Cells in Haustoria of the Root-Parasitic Plant Phelipanche aegyptiaca Retain Nuclei and Are Not Mature Sieve Elements
Source: PubMed Central journal article supplement (PMC5750636; doi:10.3390/plants6040060), 2017-12-05
Supplement: plants-06-00060-s001.pdf [file plants-06-00060-s001.pdf]

Supplementary Table S1. DNA sequences of PaNEN1, PaNEN4 and PaNAC45 cDNAs.

>PaNEN1

ACAAGCAAGCTATACATAACCGTGAACCTTTACATACACATATACTCACACACAGACACGGTGGGTA  
GGTATTACATCTTCAAATTGGCTCCCATTCCTGAATAAACCTCTGAAACAAGAAAATGGCGGTTACAG  
GCGACGATAAATCGGAGATAGCATTCTTCGACTTGGAGACGACTGTTCCGACCCGAACCGGTCAGGGT  
CATGCCATTTTGAATTCGGAGCCATTCTGGTTTGCCCCAAGAAGCTTGTGGAGCTTCGAAGTTACCCC  
ACCTTGGTCCGACCCGCTGACCTCTCCACATTACATCTCTTCCGTCCGCTGCAATGGCATCACTAAA  
GACGCCGTCGTTTCTGCACCTACTTTCGCTGATATTGCTGATATGGTCTACGAACTTCTTCACGGAAGA  
ATATGGGCTGGTCATAATATATTGAGATTTGATTGTGCTCGTATAAGGGAGGCATATGCTGAGATTAA  
CAAGCCAGTCCCGGAGCCTAAGGGAACCTATTGATTTCGCTAGCACTCTTAACACAAAAGTTTGGAAAGGA  
GAGCTGGTGATATGAAGATGGCATCTCTTGCAACATATTTTGGGCTTGGCCAGCAAACCCATAGGAGT  
TTGGATGATGTTTCGCATGAATCTGGAAGTCCTCAAGTACTGTGCAACTGTTCTATTTTTTGGAACTTAGC  
CTCCAGACATATTTACGGAAAACAGTTGGGTTTCTCCGAACGCTACCACAAGAAGTCGAAGCAATGG  
AAAAAGTTCTAGAGAGAAGAATGAAAGCACGCCATCTTCGAGTATCAACGTTGAATATCTTTCAACAT  
CATCTCCACCTCATAACACAGTGGAGGAAAATCACCTATACTGTCGCTTATGTCACCCAACACCGGT  
GAAGTAAATTTGCCCTCACTGAACCCAATCCAGCTGGAGCCGAACCTTTTAAACATGTCGATACTTGCC  
ATTGAAATAGAGAAGCAACGGCTTTCTGAGGATAATATGGAAGGAGAGAGAACCGACTCAACATCTC  
CAGAATATTCAACTGCACTAGTAGGTAATGGGCAACCCAATGGCTGTAATAACGACTTCGTGGAGCTC  
GATGATATTTCAATATCTTCGATTTCTGTATCTCTCGTACCCTTTTACCGTGGGACCCAAAAAATACAA  
ATATTGCATCGAAATCTACCGTTGCAAGTTCAATGTACATGCCTGAAGATTCGATTTGGGATCAGTACG  
AAATTTGTTGATCATGCTGGTTCGGCCACGGTTGAATTTTGTGGTGGATGCATCCCCGAGTCTCTGCGAA  
GTTCTTGACACAGCCGATAGTCTTGCCAGAAGCTGTCAAGTGATTCTGGTAGCTCTTCTGAGTGGCGA  
CCTGTGGTGACCAGGAAGAGAGGCTTCTTCAACTCTCCGACTATCCGGTTGCACCTACCGACTATAGC  
AGATGGTGAACATACCCGATGCTCAACCGAGATATACCAGAAAGATAACTCGGCAACACAAAGGCTT  
GTGTTTAGTAGATTTCGACGCTAATGAGCTGGATTCCCTAATCACTCCCGGGAATATTGTGGATGTGAGT  
TTCTCCTTGGACGTCTATGATTATCAGCAAAATGCCGGCATCCGATTGGTGGCAAAAAAACTGACTGTT  
CATTCTACCTGATGGAATAACTGACCTTAAATTATTGTTTTTTTATTTTCTTTTTTTACTATGTGAATGCTC  
ATCCTGAGCGAGACAAGTTAATTAAGGTTTATGTTGGATTTTTTTAAGAAAACCTTGATGTGGTTC  
TTGGTTGTATTGTAAGGATGGTTTGAATTAACTTTGGTGCTGTTA

>PaNEN4

ACAGATGTAGTGTATGCTAGGATTACCCTTTAACAAGGACTTAGCTGAGCACACCCTTTGTCCAAACA  
AAATATAACTTGAATTACAAGACAATCAATCTCCAATGCATGTCAAAAAGAATATTCTTATGCCAAATT  
CTAAATCTTGCTTTCAAATCGTCCCTCTCTCCGTTTCATCTATAAATTTCCAACAGCAATTAACAAAATCA  
TCTAGCACCACAAAATTTAAAAAAGAAATTATATAACCGTAAAAAATGGCTATTCCGGATAAAA  
ACCTATAAAAATATCATATCAGAAATTGTGTTCTTCGATTTAGAAACTACGTTTCCTAGCAAAACCGGA  
CAAAAATTTTACATCCTGGAATTTGGCGCCATTGTCGTTTTGTCCGAAAAAATTAATCGAGCTTGAGAGC  
TATTGCACGCTGATTAGGCCACGGGATATATCGGTTGTGCCCGTCAAATCCGGACGGTCAGATGGAAT  
AACCGCTGGGGCTATAGCCAATGCTCCTTGGTTTGTGATGAAGTTGCTGACAAGATTTTCGACGTA  
TGAAGAAATATGGGCTGGCCACAATATTCAACGGTTCGACTGTGTTCCGGATTAAGAAGCATTGAGC  
AGATTAATCGGGCACCACCGAAGCCAGCTGGTATCATTGATTCATTAGGAGTGTTAACTGAGAAGTTT  
GGAAGGAGGGCTGGAAATATGAAGATGGCAACACTGGCGGATTATTTGGTCTTGGCCAGCAAAAGC  
ATAGGAGCATGGAGGATGTAAGAATGAACTTGGAAAGTCTTAAAGCATTGTGCAACTGTACTCCTTCTG  
GAATCAAGCCTGCCCCAGACGCATTAATAGGCAATGCCGCAGCGGCCCAAGTGTTACTACAAGAA  
GCAGAAGCTCACTGCAATCTACTAGTCCTGATAGTTTGTGTAACAAACCTTCAAGAATCAGAGGGGAAA  
ACAAATAGCAGGGAAGAGAGAAGCCGAAAATGGCCTCCATCATCAACTTCTCATCAGAGGGCTGTGC  
CTTATGCAAGACAAAGTATTGGAAGATGACAGATAGAGTGAAGAATATATTTTCTACGCCAAGAGT  
CGGCCTCTGAGTAACTTTTTGAAGCATTGAAATCCCTAATTGGGTGAGAAAGAATAGGAAGA  
TTCTTGCTAACAACAAAATTTGAAGCAGAAAAAAGTTGCCAGAGGTACATAATCAAGGCTTTGTC  
ATCCTGTAGATGCAACCTTGTACTTGGTGAATACAGTATGTTACAACACTGACAATGTCAACATGCAAAT  
TGTTAAGAGTTCAAACCTTTGTAAGATGGTGTCTGTTAT

>PaNAC45

ATTTCAAAAAGGACCAGGAGACTGGTATATTTTACATATGGCACCGGTTTCATTGCCTCCCGGTTTCC  
GATTTACACCCACCGATGAAGAGTTAGTGGCTTATTACCTAACAGAAAGATCAATGGCCGAAAAATC  
GATCTTGAGGTCATCCAAGAAGTTGATCTCTACAAGTGTGAGCCATGGGACCTTCCAGGAAAGTCATT  
ATTGCCAAGCAAAGATCTTGAATGGTACTTTTTTAGCCCTCGGGACCGCAAGTATCCCAACGGGTCAA  
GGACGAACCGGGCAACAAAAGCCGGTTATTGGAAGGCCACAGGAAAGGACCGAAAAGTGAGTTCACA

AATGAGGGCAGTAGGGATGAAGAAGACCCTAGTTTATTACAGAGGGAGAGCGCCACATGGAGCTCGG  
ACCGATTGGGTTATGCATGAATATCGTTTAGACGAAAGGGAATGTGATGCTCCCCTGGCTTGCAGGA  
TGCTTATGCCCTTTGCCGTATATTCAAGAAAAGTTTGAACATCCCGAAAATCGGAGATCATTATGTTGC  
TTCAGCCAGCGATCGGTCCTCCAGCATCGGCCTACATTGTGATGCAAAATATGAGAATAATGATCTAA  
TTGATAGTTCTTCTGAATATCCAATGCCAATGAACT
